# Supplementary material
Source: HighWire-hosted journal article supplement (https://le.uwpress.org/highwire/filestream/2910/field_highwire_adjunct_files/0/LE-96-4-04-Liu-appA.pdf)
Supplement: LE-96-4-04-Liu-appA.pdf [file LE-96-4-04-Liu-appA.pdf]

Appendix A

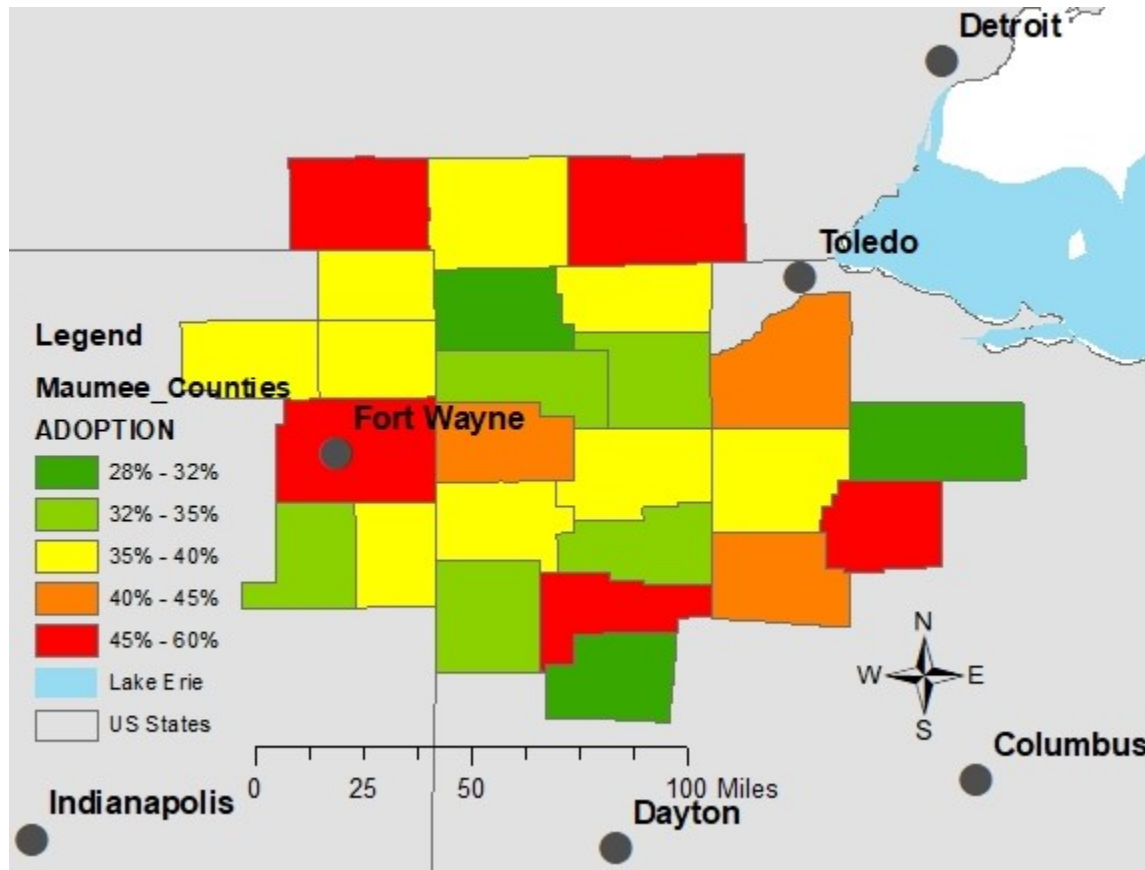

Figure A1. Map of subsurface placement adoption based on the survey
